# Supplementary material for: Transcriptome and Physiological Analysis of Rootstock Types and Silicon Affecting Cold Tolerance of Cucumber Seedlings
Source: MDPI journal article supplement (doi:10.3390/plants11030445), 2022-02-06
Supplement: s1 [file s1]

## Supplementary Materials

**Table S1.** Sequencing quality statistics of cucumber leaf transcriptome under cold stress.

| Sample | Raw Reads | Clean Reads | Q20%  | Q30%  | GC%   | Total Mapped(%) |
|--------|-----------|-------------|-------|-------|-------|-----------------|
| Z1     | 46241710  | 45569710    | 97.57 | 92.94 | 43.03 | 96.05%          |
| Z2     | 43041650  | 42464898    | 97.57 | 92.89 | 43.54 | 96.26%          |
| Z3     | 47441526  | 46897024    | 97.74 | 93.32 | 43.6  | 96.15%          |
| Z+1    | 43726582  | 43257350    | 97.77 | 93.38 | 43.99 | 96.18%          |
| Z+2    | 46267878  | 45690616    | 97.64 | 93.07 | 44.28 | 96.13%          |
| Z+3    | 48080806  | 47532624    | 97.76 | 93.37 | 44.22 | 96.29%          |
| H1     | 49053480  | 48529996    | 97.75 | 93.33 | 44.99 | 96.11%          |
| H2     | 44898826  | 44429784    | 97.61 | 93.02 | 44.91 | 95.77%          |
| H3     | 42480046  | 42000092    | 97.84 | 93.55 | 44.61 | 95.79%          |
| Y1     | 47396360  | 46855292    | 97.52 | 92.94 | 44.29 | 95.84%          |
| Y2     | 48157904  | 47623126    | 97.67 | 93.32 | 44.54 | 95.99%          |
| Y3     | 51236556  | 50605962    | 97.61 | 93.2  | 44.58 | 95.75%          |

**Table S2.** Statistical table of Silicon induced transcription factors.

| Family | Gene Name        | Gene Description                                       | Control FPKM | Treat FPKM | Expression |
|--------|------------------|--------------------------------------------------------|--------------|------------|------------|
| bHLH   | LOC101219379     | transcription factor bHLH67                            | 6.45         | 11.38      | up         |
|        | LOC101213736     | transcription factor BEE 3-like                        | 1.58         | 5.82       | up         |
|        | LOC101212782     | transcription factor bHLH94-like                       | 1.13         | 2.49       | up         |
|        | LOC101205864     | transcription factor bHLH30-like                       | 0.84         | 3.18       | up         |
|        | LOC101204984     | transcription factor bHLH62, transcript variant X2     | 1.48         | 0.85       | down       |
| MYB    | LOC101212679     | myb-related protein P-like                             | 0.09         | 0.59       | up         |
|        | LOC101219416     | transcription factor WER-like                          | 1.76         | 8.59       | up         |
|        | LOC101203523     | transcription factor MYB44-like                        | 60.72        | 127.76     | up         |
|        | LOC101214125     | myb-related protein 308                                | 0.11         | 1.06       | up         |
|        | LOC101206608     | ethylene-responsive transcription factor ERF054-like   | 0.03         | 0.36       | up         |
| ERF    | LOC105435700     | ethylene-responsive transcription factor ESR2-like     | 0            | 0.79       | up         |
| NAC    | LOC101219993     | ethylene-responsive transcription factor 3             | 16.7         | 6.79       | down       |
|        | LOC105436223     | NAC domain-containing protein 19                       | 8.22         | 4.69       | down       |
|        | LOC101206181     | protein FEZ-like                                       | 16.91        | 7.88       | down       |
| bZIP   | LOC101210422     | transcription factor JUNGBRUNNEN 1                     | 2.32         | 1          | down       |
|        | LOC101223216     | transcription factor TGA6, transcript variant X1       | 0.3          | 0.13       | down       |
|        | LOC101214116     | ocs element-binding factor 1                           | 5.81         | 2.83       | down       |
| AP2    | LOC101205762     | AP2-like ethylene-responsive transcription factor AIL1 | 0.24         | 0.85       | up         |
| FAR1   | LOC101220527     | protein FAR1-RELATED SEQUENCE 2, transcript variant X1 | 0.43         | 1.13       | up         |
| Others | HSF LOC105435962 | heat stress transcription factor B-2a-like             | 8.51         | 17.96      | up         |
|        | LOC101216040     | zinc-finger homeodomain protein 5                      | 0.72         | 1.88       | up         |
|        | LOC101204350     | zinc-finger homeodomain protein 9-like                 | 1.17         | 3.31       | up         |
|        | LOC101212689     | zinc finger protein CONSTANS-LIKE 6-like               | 3.31         | 12.98      | up         |
|        | LOC101220917     | dof zinc finger protein DOF3.6-like                    | 1.64         | 3.7        | up         |

|              |                                                                    |       |       |      |
|--------------|--------------------------------------------------------------------|-------|-------|------|
| LOC101214816 | zinc finger protein CONSTANS-LIKE 5-like,<br>transcript variant X2 | 66.53 | 36.48 | down |
| LOC105435572 | cyclic dof factor 1                                                | 6.47  | 3.23  | down |

**Table S3.** Statistical table of transcription factors induced by grafting on ‘Huang Chenggen No. 2’.

| Family | Gene name    | Gene Description                                          | Control FPKM | Treat FPKM | Expression |
|--------|--------------|-----------------------------------------------------------|--------------|------------|------------|
|        | LOC101217253 | NAC transcription factor 29-like                          | 7.78         | 11.55      | up         |
|        | LOC101206465 | NAC domain-containing protein 100-like                    | 2.58         | 4.92       | up         |
|        | LOC101207407 | NAC domain-containing protein 90-like                     | 2.08         | 0.48       | down       |
| NAC    | LOC101212552 | NAC domain-containing protein 67-like                     | 31.44        | 15.61      | down       |
|        | LOC105436223 | NAC domain-containing protein 19                          | 8.22         | 1.51       | down       |
|        | LOC101206181 | protein FEZ-like                                          | 16.91        | 7.19       | down       |
|        | LOC101210422 | transcription factor JUNGBRUNNEN 1                        | 2.32         | 0.78       | down       |
|        | LOC101210268 | transcription factor DIVARICATA                           | 4.87         | 9.21       | up         |
|        | LOC101214125 | myb-related protein 308                                   | 0.11         | 0.85       | up         |
|        | LOC101204148 | myb-related protein Myb4-like                             | 7.62         | 4.74       | down       |
|        | LOC101209599 | myb-related protein 305-like                              | 9.33         | 4.12       | down       |
| MYB    | LOC101205761 | vacuolar cation/proton exchanger 5, transcript variant X2 | 0.88         | 0.24       | down       |
|        | LOC101212679 | myb-related protein P-like                                | 0.09         | 0.38       | down       |
|        | LOC101214834 | transcription factor MYB114-like, transcript variant X1   | 0.61         | 0.14       | down       |
|        | LOC101204148 | myb-related protein Myb4-like                             | 7.62         | 4.74       | down       |
|        | LOC101214240 | transcription factor LAF1-like                            | 1.97         | 0.6        | down       |
|        | LOC101206608 | ethylene-responsive transcription factor ERF054-like      | 0.03         | 1.5        | up         |
|        | LOC101211577 | ethylene-responsive transcription factor ERF110-like      | 4.21         | 15.58      | up         |
| ERF    | LOC101213348 | ethylene-responsive transcription factor ABR1-like        | 5.71         | 14.39      | up         |
|        | LOC101209150 | ethylene-responsive transcription factor ERF011-like      | 1.25         | 4.24       | up         |
|        | LOC101213288 | ethylene-responsive transcription factor ERF017           | 5.9          | 1.76       | down       |
| WRKY   | LOC101205991 | probable WRKY transcription factor 48                     | 8.24         | 19.96      | up         |
| HSF    | LOC101209621 | heat stress transcription factor A-4d                     | 7.74         | 3.27       | down       |
| bHLH   | LOC101205943 | transcription factor bHLH137                              | 1.22         | 2.79       | up         |
|        | LOC101216040 | zinc-finger homeodomain protein 5                         | 0.72         | 1.53       | up         |
|        | LOC101212689 | zinc finger protein CONSTANS-LIKE 6-like                  | 3.31         | 11.85      | up         |
| Others | LOC101219003 | zinc finger protein CONSTANS-LIKE 6                       | 11.47        | 22.2       | up         |
|        | LOC101204440 | dof zinc finger protein DOF1.7-like                       | 6.39         | 25.48      | up         |
|        | LOC101206016 | B-box zinc finger protein 18, transcript variant X1       | 35.37        | 17.14      | down       |

**Table S4.** Statistical table of transcription factors induced by grafting on ‘Yunnan figleaf gourd’.

| Family | Gene Name    | Gene Description             | Control FPKM | Treat FPKM | Expression |
|--------|--------------|------------------------------|--------------|------------|------------|
| MYB    | LOC101216901 | protein ODORANT1-like        | 1.83         | 3.4        | up         |
|        | LOC101206909 | myb-related protein 315-like | 0.42         | 0.86       | up         |

|        |              |                                                                   |        |       |      |
|--------|--------------|-------------------------------------------------------------------|--------|-------|------|
|        | LOC101206700 | myb-related protein 308-like                                      | 1.51   | 3     | up   |
|        | LOC101212775 | transcription repressor MYB6-like                                 | 0      | 0.22  | up   |
|        | LOC101216185 | myb-related protein 330-like                                      | 3.92   | 5.6   | up   |
|        | LOC101214125 | myb-related protein 308                                           | 0.11   | 0.85  | up   |
|        | LOC101212679 | myb-related protein P-like                                        | 0.09   | 0.38  | up   |
|        | LOC101213371 | myb-like protein I                                                | 0      | 0.25  | up   |
|        | LOC101216920 | transcription factor MYB59-like                                   | 9.72   | 3.73  | down |
|        | LOC101204148 | myb-related protein Myb4-like                                     | 7.62   | 4.74  | down |
|        | LOC101214240 | transcription factor LAF1-like                                    | 1.97   | 0.6   | down |
|        | LOC101209131 | protein CUP-SHAPED COTYLEDON 3, transcript variant X2             | 1.07   | 3.31  | up   |
|        | LOC101207407 | NAC domain-containing protein 90-like                             | 2.08   | 0.48  | down |
|        | LOC101212552 | NAC domain-containing protein 67-like                             | 31.44  | 15.61 | down |
| NAC    | LOC105436223 | NAC domain-containing protein 19                                  | 8.22   | 1.51  | down |
|        | LOC101211941 | NAC domain-containing protein 21/22-like, transcript variant X2   | 31.31  | 18.23 | down |
|        | LOC101217627 | NAC transcription factor 25                                       | 145.08 | 102.7 | down |
|        | LOC101214387 | NAC domain-containing protein 100-like                            | 1.39   | 0.97  | down |
|        | LOC101210422 | transcription factor JUNGBRUNNEN 1                                | 2.32   | 0.78  | down |
|        | LOC101203971 | transcription factor bHLH74-like                                  | 0.13   | 0.46  | up   |
|        | LOC101213736 | transcription factor BEE 3-like                                   | 1.58   | 3.3   | up   |
|        | LOC101205943 | transcription factor bHLH137                                      | 1.22   | 2.79  | up   |
| bHLH   | LOC101215588 | transcription factor bHLH79                                       | 6.65   | 8.41  | up   |
|        | LOC101212791 | putative transcription factor bHLH041                             | 0.42   | 1.01  | up   |
|        | LOC101203107 | transcription factor bHLH35-like                                  | 6.99   | 4.43  | down |
|        | LOC101205392 | transcription factor bHLH128                                      | 43.71  | 23.38 | down |
|        | LOC101214847 | probable WRKY transcription factor 21, transcript variant X2      | 0.14   | 0.54  | up   |
| WRKY   | WRKY22       | probable WRKY transcription factor 70-like                        | 37.29  | 44.25 | up   |
|        | WRKY52       | probable WRKY transcription factor 68-like                        | 0.87   | 1.55  | up   |
|        | LOC101218177 | probable WRKY transcription factor 48                             | 1.42   | 2.73  | up   |
|        | LOC101217296 | WRKY transcription factor 55                                      | 1.83   | 1.09  | down |
|        | LOC101206608 | ethylene-responsive transcription factor ERF054-like              | 0.03   | 1.5   | up   |
|        | LOC101213348 | ethylene-responsive transcription factor ABR1-like                | 5.71   | 14.39 | up   |
| ERF    | LOC101206124 | ethylene-responsive transcription factor ERF115                   | 1.03   | 2.16  | up   |
|        | LOC101207613 | ethylene-responsive transcription factor CRF4                     | 8.29   | 3.23  | down |
|        | LOC101219745 | ethylene-responsive transcription factor TINY-like                | 6.78   | 3.57  | down |
|        | LOC101208010 | heat stress transcription factor A-6b-like, transcript variant X1 | 3.86   | 1.41  | down |
| HSF    | LOC101209621 | heat stress transcription factor A-4d                             | 7.74   | 3.27  | down |
|        | LOC105435962 | heat stress transcription factor B-2a-like                        | 8.51   | 5.88  | down |
| bZIP   | LOC101203660 | ocs element-binding factor 1                                      | 26.13  | 18.19 | down |
| ARF    | LOC101216825 | auxin response factor 5, transcript variant X1                    | 0.14   | 0.64  | up   |
|        | LOC101216040 | zinc-finger homeodomain protein 5                                 | 0.72   | 1.53  | up   |
|        | LOC101216401 | zinc finger protein CONSTANS-LIKE 9-like, transcript variant X1   | 0.92   | 2.64  | up   |
| Others | LOC101219003 | zinc finger protein CONSTANS-LIKE 6                               | 11.47  | 22.2  | up   |
|        | LOC101204440 | dof zinc finger protein DOF1.7-like                               | 6.39   | 25.48 | up   |
|        | LOC101215098 | cyclic dof factor 3-like                                          | 0.84   | 1.18  | up   |
|        | LOC101206938 | dof zinc finger protein DOF5.7                                    | 1.78   | 1.08  | down |

|              |                                                     |       |       |      |
|--------------|-----------------------------------------------------|-------|-------|------|
| LOC101206016 | B-box zinc finger protein 18, transcript variant X1 | 35.37 | 17.14 | down |
| LOC101208899 | B-box zinc finger protein 18-like                   | 7.64  | 4.39  | down |

**Table S5.** Primer sequence of real-time fluorescent quantitative PCR.

| Gene_Name    | Gene_Description                                        | Primer Sequences (Forward/Reverse Primer)                   |
|--------------|---------------------------------------------------------|-------------------------------------------------------------|
| LOC101206608 | ethylene-responsive transcription factor<br>ERF054-like | F:AATCACCACCCAATTCACCCATTCC<br>R:AGAGGCAGGAGAAGAAACAGAGGAG  |
| LOC101218177 | WRKY transcription factor 48                            | F:GCAGGGTGTGGTGTGAAGAAGAG<br>R:GAGGCTGTTGTTGGTGGATTCTGG     |
| LOC101218178 | phenylalanine ammonia-lyase                             | F:CGAGAGCAGCCATGTTGGTGAG<br>R:CCACGAAGAGGCAAGCAAGGAG        |
| LOC101218179 | peroxidase 31                                           | F:GACATTCTCGCCCTTGCCACTC<br>R:TTTCGGTAAAGAGCCAGGAATCGTC     |
| LOC101218180 | ABC transporter B family member 2                       | F:TGGACGGATTGGAGTTGATGGAATG<br>R:TGACGCCGACAATGCCATACATC    |
| LOC101218181 | glutathione S-transferase U8                            | F:GGTTTCCGCTCAGGTTTCGTATAGTC<br>R:CGGCACTTTCTGGTAAATTGGGTTG |
| LOC101218182 | chlorophyll a-b binding protein CP26                    | F:GACTCAGCAAGAAGCCCGAAGAC<br>R:CCTCAGGGATGATGAAACCAGCAG     |
| LOC101218183 | abscisic acid receptor PYL2                             | F:CTTCAGGGTGGTGGGAGGAGAG<br>R:CGGTGTTCCCTTCTGGTATGTCAAC     |
|              | actin                                                   | F:CACGGGTATTGTTCTT<br>R:TCTTCTTGATGTCCCT                    |
